# Supplementary material for: Intron retention enhances gene regulatory complexity in vertebrates
Source: PubMed Central journal article supplement (PMC5688624; doi:10.1186/s13059-017-1339-3), 2017-11-16

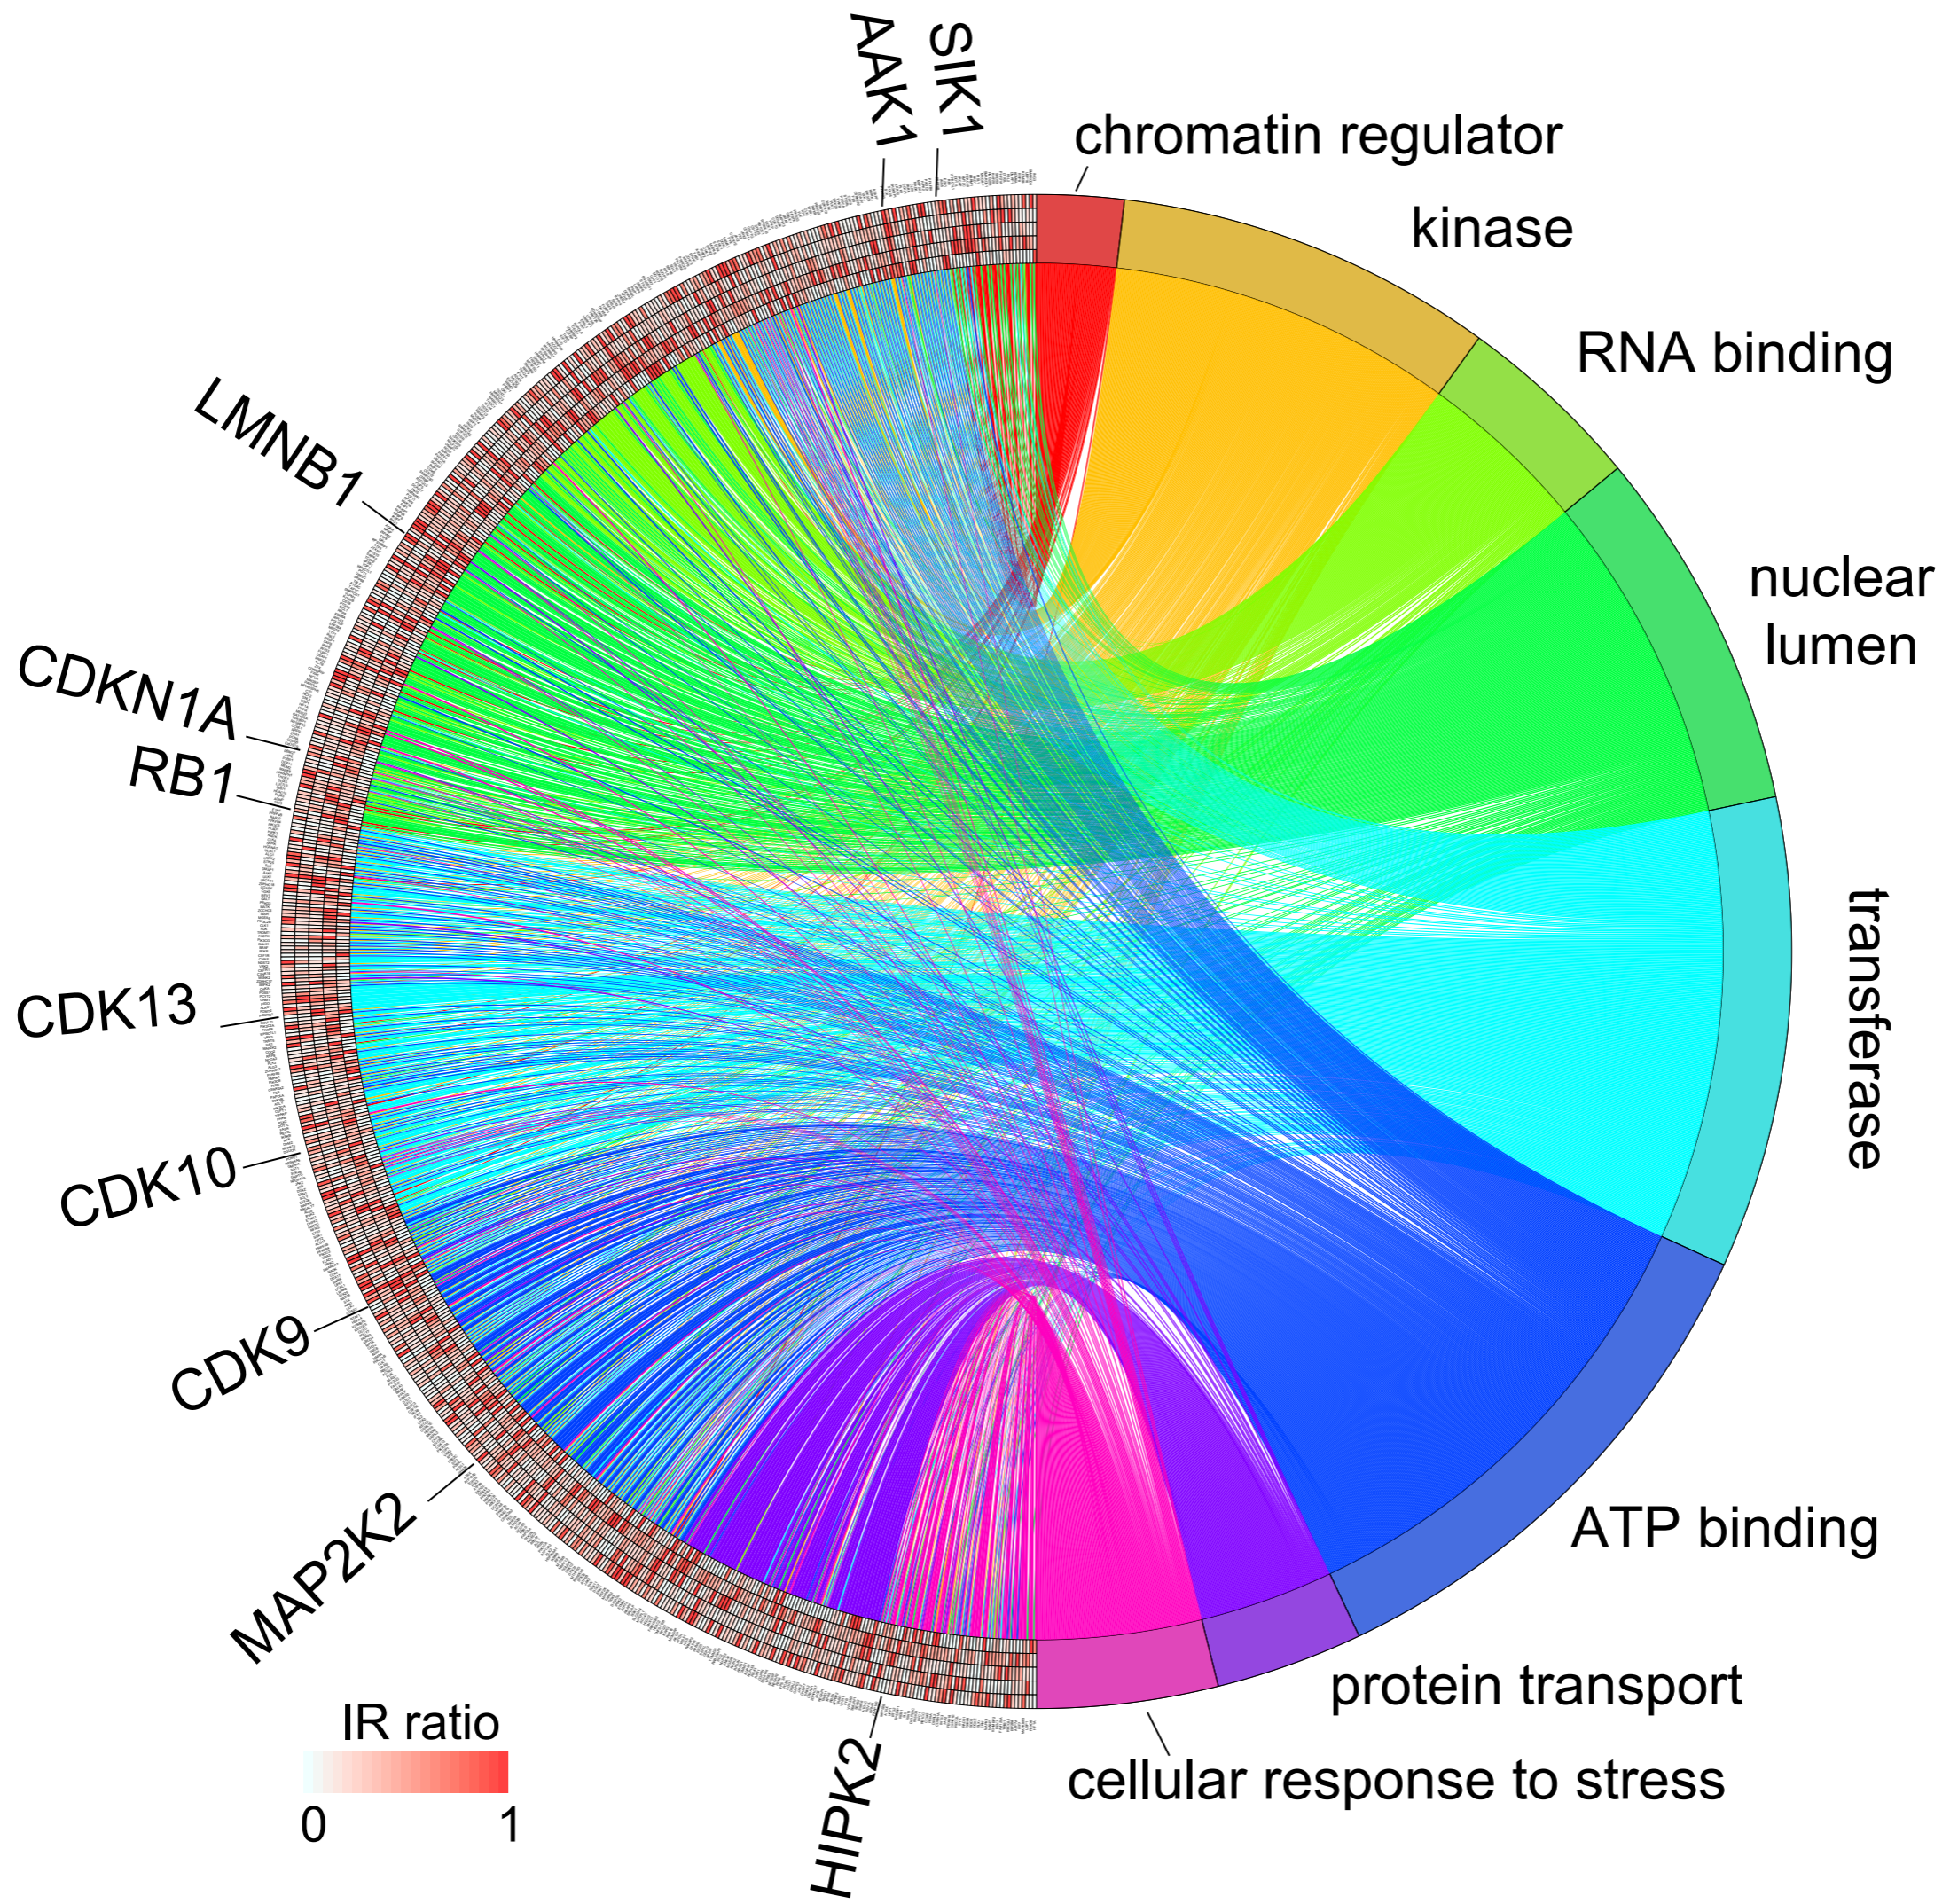

Supplement: 13059_2017_1339_MOESM5_ESM.pdf [file 13059_2017_1339_MOESM5_ESM.pdf]
